# Supplementary material for: Integrierte Versorgung von Rettungsdienstpatienten. Konsentierte Empfehlungen für optimale Prozesse und Strukturen
Source: Springer Nature journal article supplement (doi:10.1007/s10049-022-00995-0), 2022-03-10

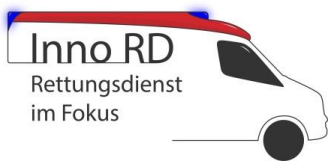

### **Hinweis zum Aufbau und Nutzung der Fallvignette (FV)**

Zu jeder Fallvignette wurde ein DIN A4-Blatt doppelseitig bedruckt (2 Seiten eine Fallvignette) und als mittig gefaltetes Leaflet den Fokusgruppenteilnehmern präsentiert, sodass die fortfolgenden Abschnitte zunächst verborgen blieben. Der Moderator kündigte an, wann der nächste Abschnitt gelesen und diskutiert werden sollte. Damit wurde weitestgehend gewährleistet, dass jeder Abschnitt der FV nacheinander strukturiert in den typisch ablaufenden Versorgungsphasen diskutiert wurde. Die Nummerierung, die als Wasserzeichen hinter dem Text erscheint, gibt die Reihenfolge der Abschnitte wieder. Der Pfeil in der Fußzeile diente der Orientierung.

Zusatzmaterial zum Beitrag „Integrierte Versorgung von Rettungsdienstpatienten. Konsenterte Empfehlungen für optimale Prozesse und Strukturen

Rothhardt J, Piedmont S, Swart E et al. (2022) in *Notfall+Rettingmedizin*. Beitrag und Zusatzmaterial stehen Ihnen auf [www.springermedizin.de](http://www.springermedizin.de) zur Verfügung. Bitte geben Sie dort den Beitragstitel in die Suche ein.

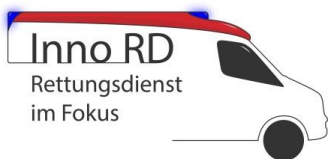

Die Notfallsanitäter bitten die Polizei um Unterstützung. Diese ist nach 30 Minuten noch immer nicht vor Ort. Die Notfallsanitäter bestellen die Polizei daraufhin ab. Der mittlerweile wieder eingeschlafene Julius wird auf einer Trage in den Rettungswagen geschoben, dort an das Monitoring angeschlossen und in das nächste Krankenhaus gefahren. Dort wird ihm eine Infusion verabreicht. Er bekommt Zeit auszunüchtern.

Julius' Vater, der ihn abholt, äußert seinen Unmut: Es sei ein Unding, dass er ihn wegen seines Trinkverhaltens schon wieder aus dem Krankenhaus abholen müsse. Julius kontert, er wäre auch mit einem anderen Ort zum Ausnüchtern zufrieden gewesen und habe selbst den Rettungsdienst nicht gerufen. Als Julius nach einigen Wochen von seiner Krankenkasse aufgefordert wird, zehn Euro Zuzahlung für die Fahrt mit dem Rettungsdienst zu bezahlen, legt er Widerspruch ein.

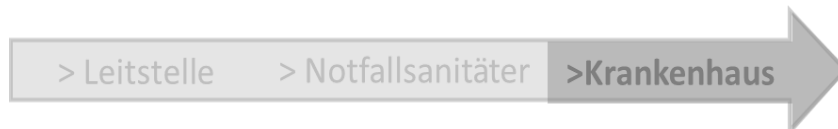

## **Fallvignette 1— Alkoholintoxikation**

An einem See am Ortsrand einer Großstadt feiert eine Gruppe junger Männer ausgelassen Geburtstag. Nach ein paar Stunden verlassen sie alkoholisiert den Platz. Die Gruppe lässt ihren Freund Julius Claussen an einer Bushaltestelle zurück, da er zu betrunken ist, um mit dem Fahrrad nach Hause zu fahren. Nur sein Freund Charlie, der noch am klarsten denken kann, bleibt bei Julius, der mittlerweile reglos auf dem Gehweg liegt.

Nach einer Weile macht Charlie sich Sorgen und wählt den Notruf. Er schildert der Leitstelle, dass sein Freund viel Alkohol getrunken habe. Er habe ihn in die stabile Seitenlage gebracht. Sein Freund reagiere nicht mehr auf Worte, scheine aber zu leben. Die Leitstelle fragt, ob der Betroffene atme, ein Puls fühlbar sei und ob Sturzverletzungen erkennbar seien. Charlie bejaht Atmung und Puls, verneint die Verletzungen. Die Leitstelle fragt, ob er die Situation allein handeln könne oder ein Rettungsdienst notwendig sei. Charlie zögert.

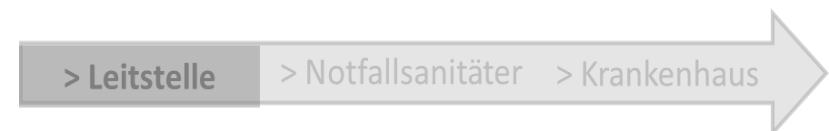



*Integrierte Notfallversorgung: Rettungsdienst im Fokus (Inno\_RD)*  
Fokusgruppeninterview

Charlie bittet darum, dass der Rettungsdienst kommt. Als dieser vor Ort ist, erwacht Julius und fängt an, die Notfallsanitäter zu beschimpfen. Er wird handgreiflich. Da der Patient nur betrunken scheint, überlegen die Notfallsanitäter wieder abzurücken. Julius ist nicht bereit eine Transportverweigerung zu unterzeichnen; er wehrt sich aber auch gegen einen Transport.

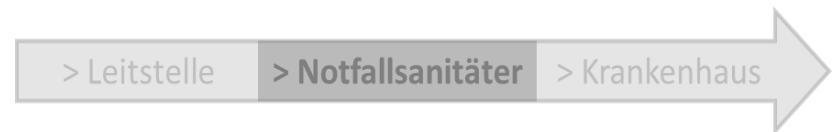



Nach vier Stunden Wartezeit wird Herr Lessing vom diensthabenden Urologen in der Notaufnahme ein neuer Dauerkatheter gelegt.

Herr Lessing wartet eine weitere Stunde, bis ihn ein Krankentransport nach Hause bringt.

Zu Hause macht Frau Lessing ihrem Mann erstmal Frühstück und gibt ihm seine Parkinson-Medikamente, die er eigentlich regelmäßig zu festgelegten Zeiten nehmen muss. Leider hatte Herr Lessing in der Aufregung selbst auch nicht daran gedacht, seine Parkinson-Medikamente mit in das Krankenhaus zu nehmen.

*Integrierte Notfallversorgung: Rettungsdienst im Fokus (Inno\_RD)  
Fokusgruppeninterview*

## Fallvignette 2 – Katheterwiedereinlage

Bernhard Lessing ist achtzig Jahre alt und lebt mit seiner Frau auf dem Land. Mit seinem diagnostizierten Morbus Parkinson und den daraus resultierenden Bewegungsstörungen ist er auf Hilfe im Alltag angewiesen. Morgens übernimmt eine Krankenschwester vom ambulanten Pflegedienst die Körperpflege und Medikamentenversorgung.

Als Herr Lessing sich vor einigen Wochen beim Urologen vorstellte, wurde eine Blasenentleerungsstörung diagnostiziert. Der Arzt verordnete einen transurethralen Dauerkatheter und klärte das Ehepaar auf, dass der Urin immer ablaufen können muss. Das Ehepaar wurde über die generelle Handhabung des Katheters informiert und kam die nächsten zwei Wochen gut damit zurecht.

Als Frau Lessing eines samstagnachts einen nassen Fleck im Ehebett bemerkt, ist sie besorgt. Sie inspiziert den komplett herausgerutschten Katheter ihres Mannes und verständigt den 24-Stunden-Pflegenotdienst.

Eine Pflegekraft ist innerhalb einer Stunde vor Ort und kann keine Blutung oder Entzündungszeichen feststellen. Die Pflegekraft traut sich die Katheterwiedereinlage nicht zu.

Sie möchte auch sichergehen, dass sie keine Fehleinschätzung der Situation trifft. Daher versucht sie einige Zeit lang vergeblich, einen diensthabenden Arzt unter der Telefonnummer 116117 zu erreichen.

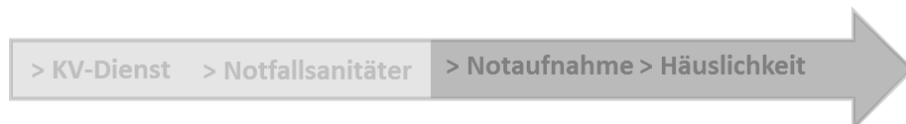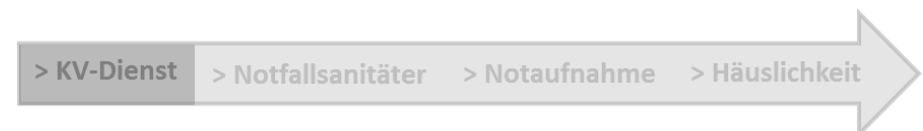



Die Pflegekraft entscheidet sich daher zusammen mit dem Ehepaar, den Rettungsdienst zu rufen.

Da es bereits nachts ist, schickt der Disponent keinen Krankentransport-, sondern einen Rettungswagen. Anhand des geschilderten Problems entscheidet sich der Disponent gegen die Entsendung eines Notarztes.

Der Rettungswagen ist 25 Minuten nach dem Anruf bei dem Patienten vor Ort.

Die beiden Rettungsdienstmitarbeiter stellen bei Herrn Lessing im Zuge des ABCDE-Schemas keine Auffälligkeiten bezüglich der Vitalzeichen fest. Wie die Pflegekraft können auch sie keine Blutungen oder Entzündungszeichen wahrnehmen.

Der Notfallsanitäter unter den beiden Rettungsdienstmitarbeitern traut sich eine Katheterwiedereinlage zu, ist dazu aber nicht befugt.

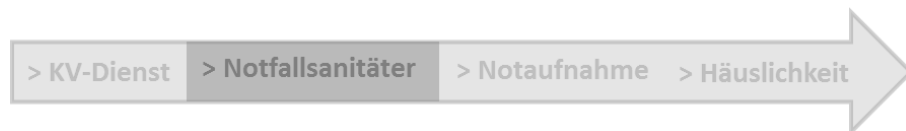

## *Integrierte Notfallversorgung: Rettungsdienst im Fokus (Inno\_RD)* Fokusgruppeninterview

Daher fahren die beiden Rettungsdienstmitarbeiter Herrn Lessing mit dessen Einverständnis in das nächstgelegene Krankenhaus. Auf der 20-minütigen Fahrt überprüfen die Rettungsdienstmitarbeiter erneut Herrn Lessings Vitalzeichen und misst seine Körpertemperatur.

Sie übergeben den Patienten in der Notaufnahme mit dem schriftlich dokumentierten und mündlichen Hinweis, dass eine Katheterwiedereinlage bei ansonsten unauffälligem Befund nötig ist.

Der Rettungsdienst verabschiedet sich.

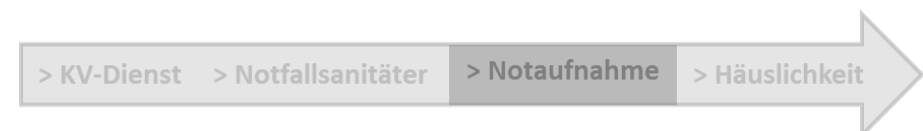

Supplement: MOESM1 [file 20207572]
