# Supplementary material for: Integrierte Versorgung von Rettungsdienstpatienten. Konsentierte Empfehlungen für optimale Prozesse und Strukturen
Source: Springer Nature journal article supplement (doi:10.1007/s10049-022-00995-0), 2022-03-10
Supplement: MOESM2 [file 20207572]

## Supplement 2: Erweiterte Disponierungs- und Weitervermittlungsmöglichkeiten von Leitstellen (Mehrfachantworten möglich; absteigend sortiert nach Zustimmung zu Disponierungsoptionen)

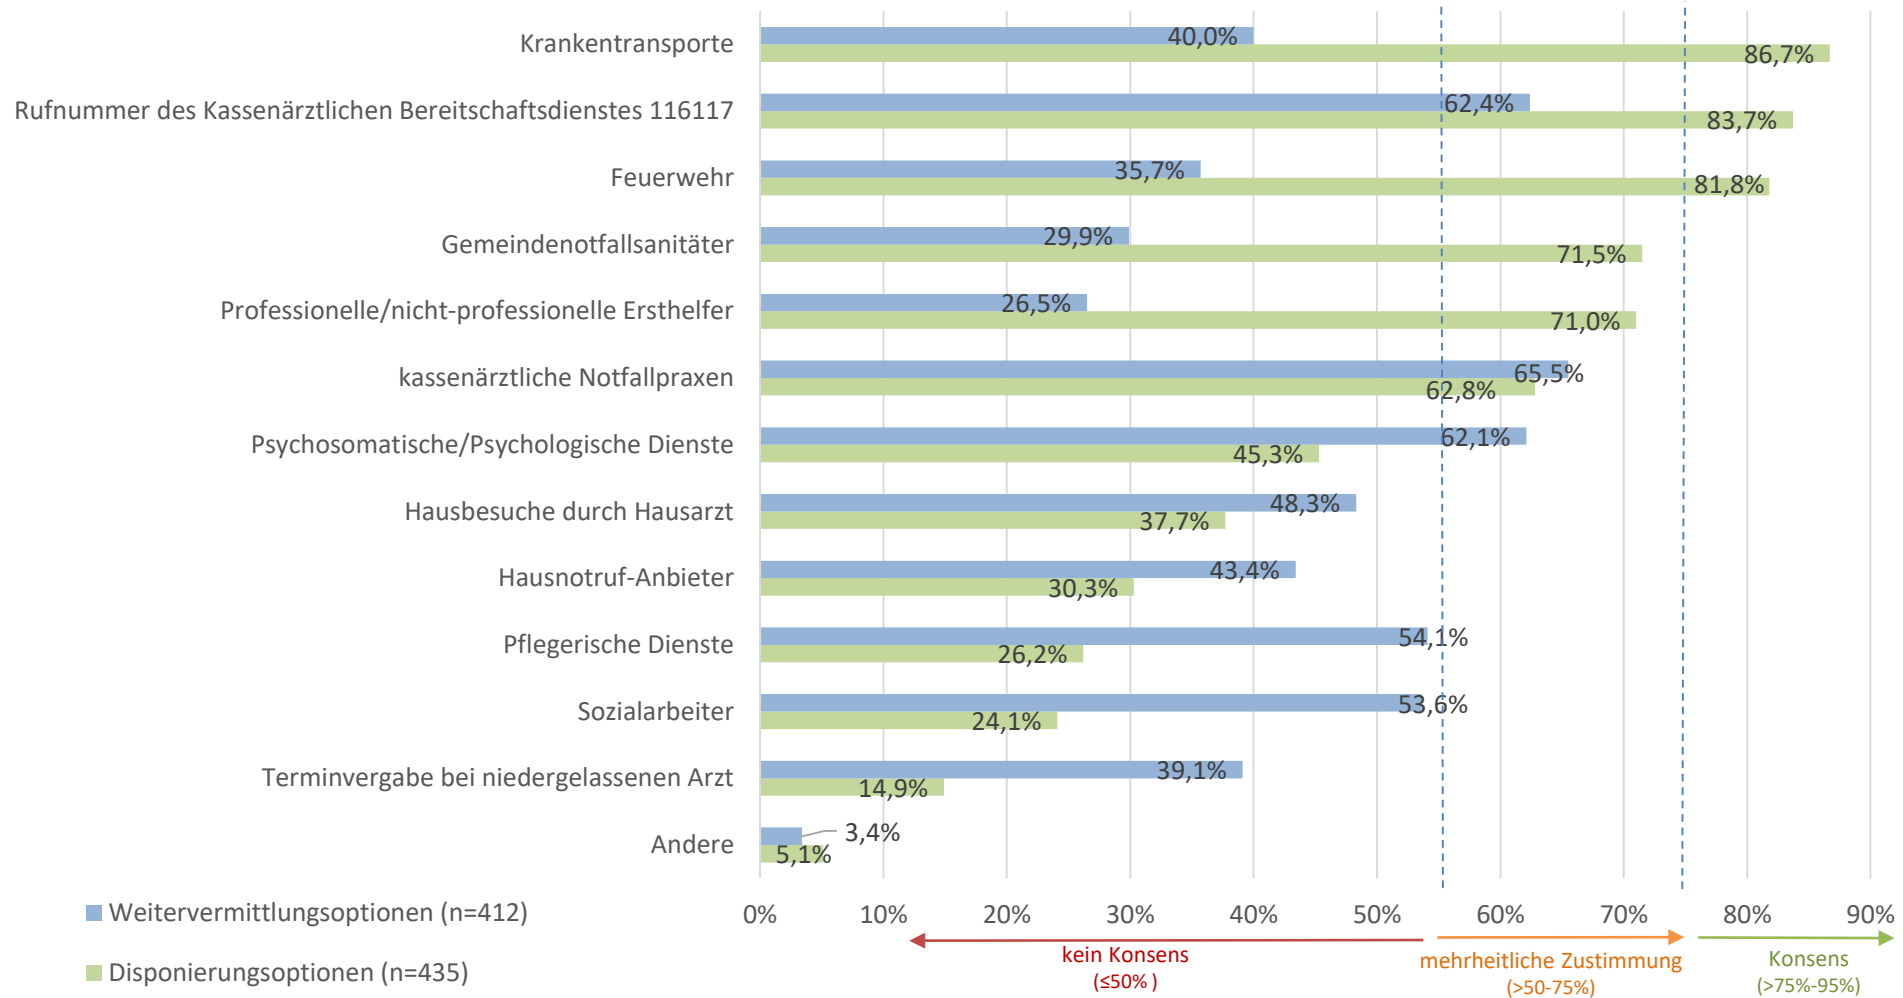

Ergebnisse der Handlungsempfehlungen: Nr. 3a: „Den Leitstellen sollten folgende (erweiterte) Möglichkeiten der Disponierung von sozialen oder medizinischen Angeboten zur Verfügung stehen.“ (n=435) und Nr. 3b: „Den Leitstellen sollten folgende (erweiterte) Möglichkeiten der Weitervermittlung von sozialen oder medizinischen Angeboten zur Verfügung stehen.“ (n=412)
