# Supplementary material for: Integrierte Versorgung von Rettungsdienstpatienten. Konsentierte Empfehlungen für optimale Prozesse und Strukturen
Source: Springer Nature journal article supplement (doi:10.1007/s10049-022-00995-0), 2022-03-10

# Supplement 3a: Statements für die Dokumentation und Evaluation von Einsätzen

**Nr. 29a:** Die standardisierte Mindest-Dokumentation [in Leitstellen] sollte in regelmäßigem Turnus optimiert werden.

**Nr. 29b:** Diese standardisierte Mindest-Dokumentation sollte... (n=406)

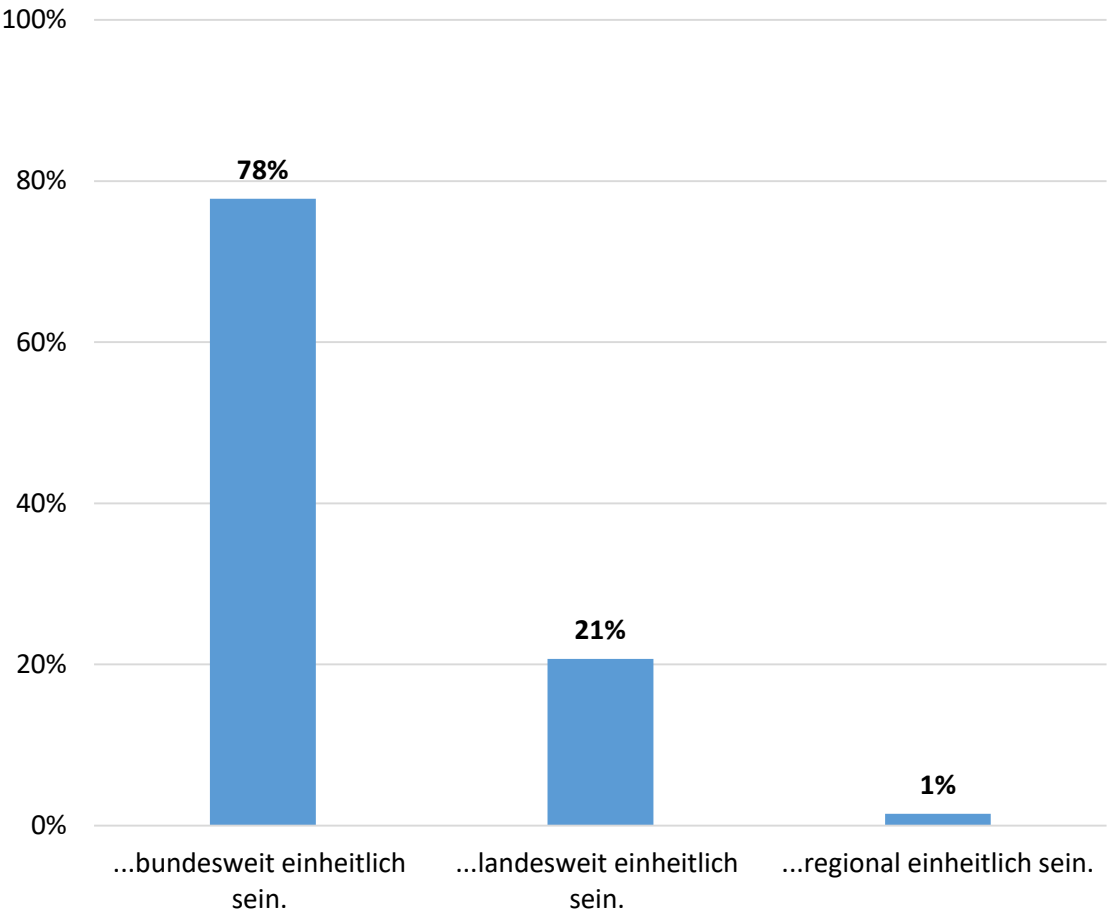

**Nr. 31a:** Die Dokumentationsstandards [des Einsatzpersonals] sollten in einem regelmäßigen Turnus optimiert werden.

**Nr. 31b:** Diese Dokumentationsstandards sollten... (n=426)

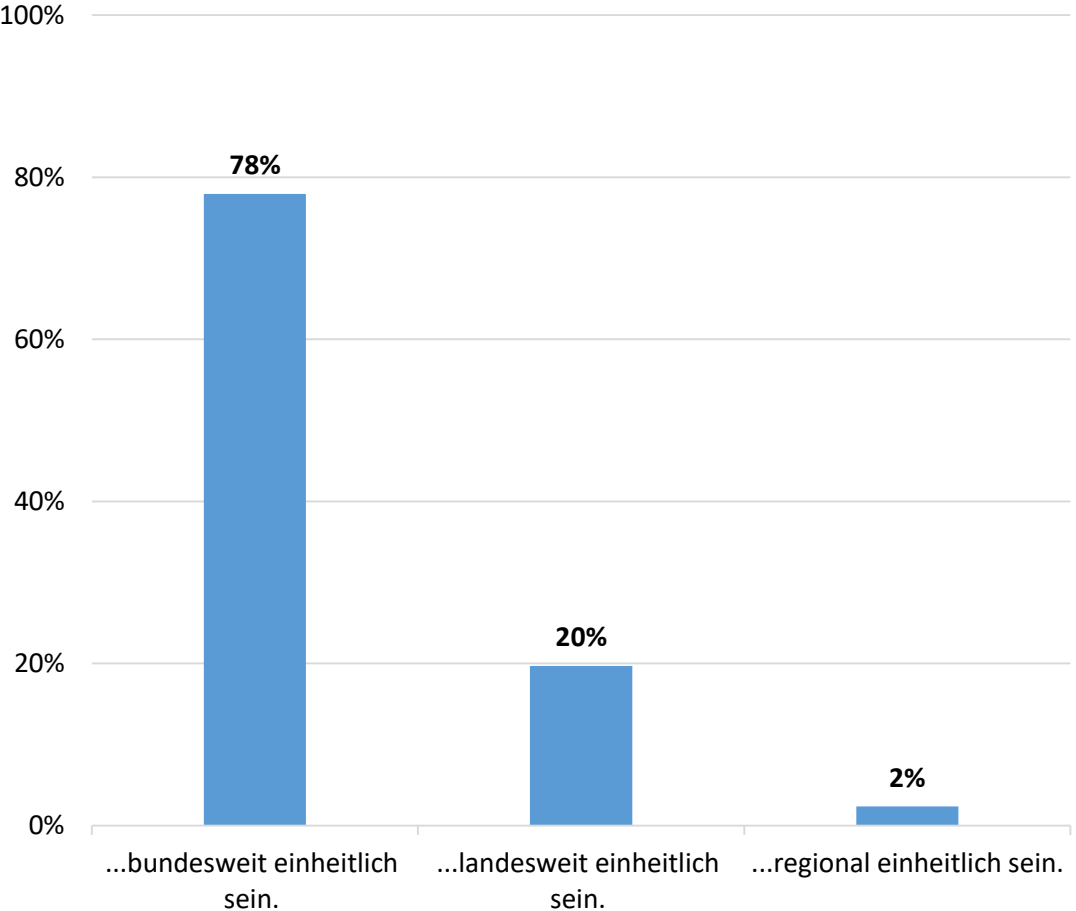

## Supplement 3b: Statements für die Dokumentation und Evaluation von Einsätzen

**Nr. 32a:** In der präklinischen Notfallversorgung ist eine standardisierte Definition, Einführung, Dokumentation und kontinuierliche Evaluation von Indikatoren zur Struktur-, Prozess- und Ergebnisqualität erforderlich.

**Nr. 33a:** Zur Entwicklung einer standardisierten Dokumentation gehört auch eine Harmonisierung der Datensätze (z. B. Minimaler Notfalldatensatz [MIND]/Datensatz Notaufnahme der DIVI).

**Nr. 32b: Diese Indikatoren sollten... (n=423)**

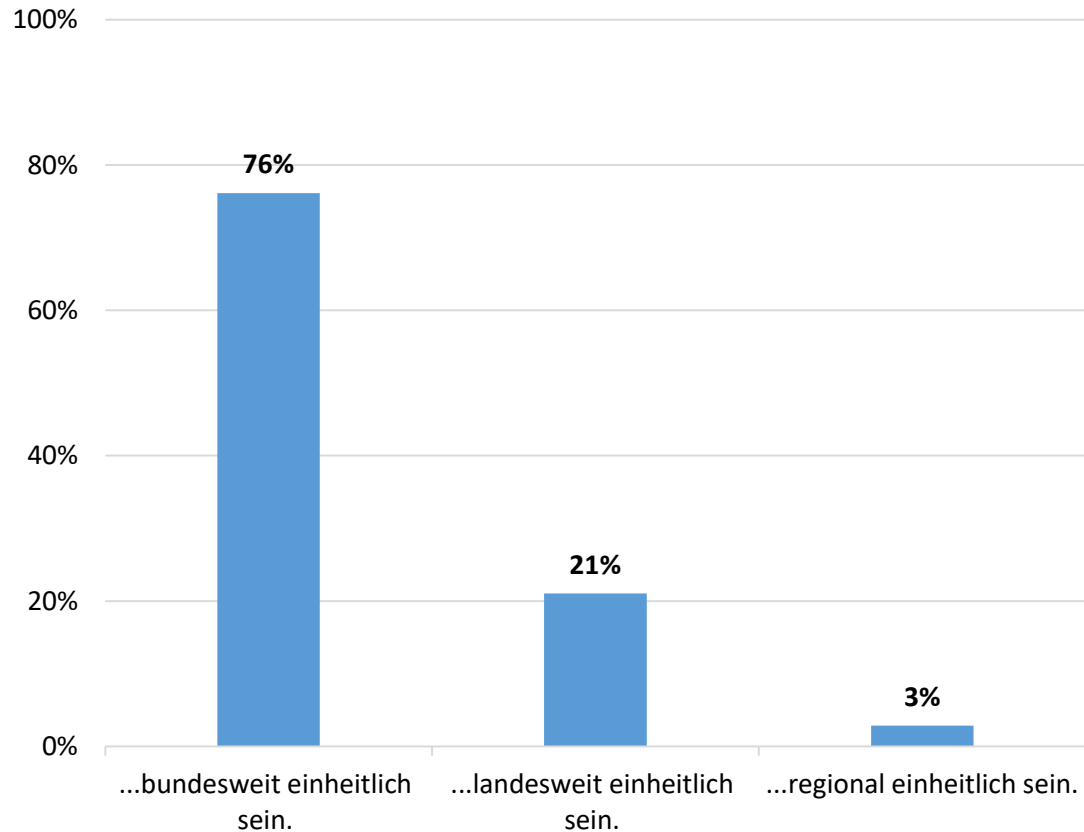

**Nr. 33b: Diese Harmonisierung sollte... (n=418)**

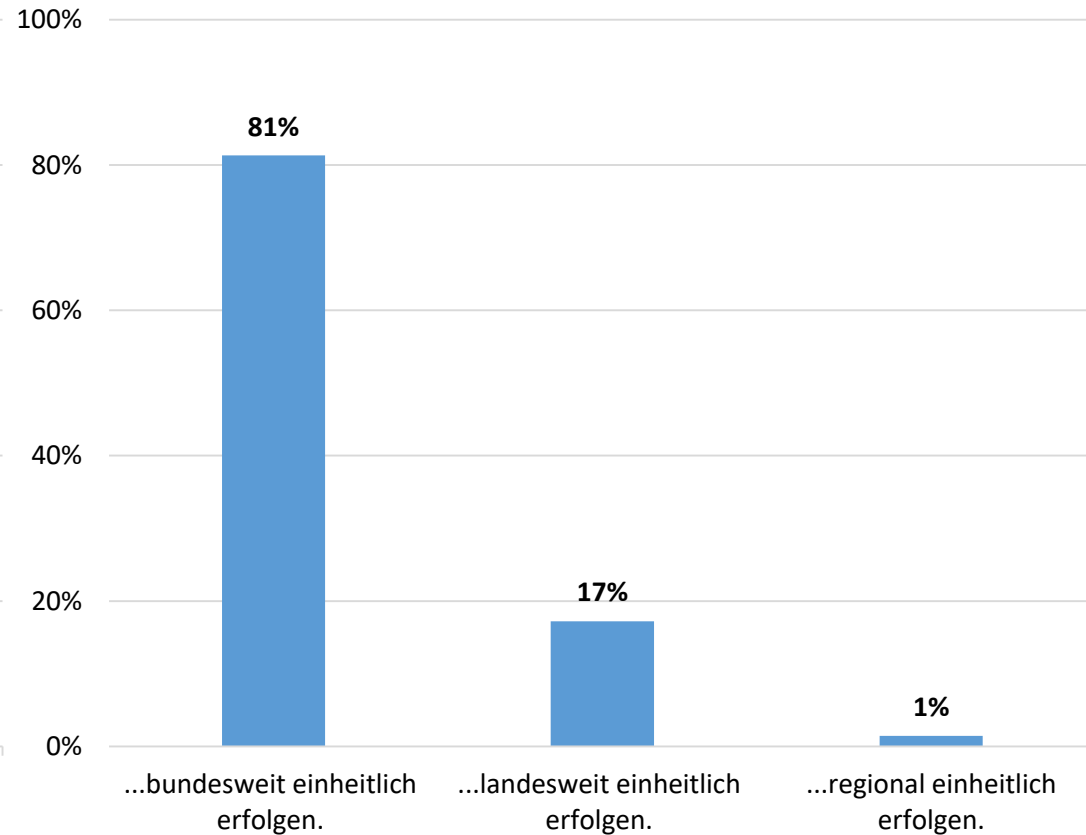

## Supplement 3c: Statements für die Dokumentation und Evaluation von Einsätzen

**Nr. 33a:** Zur Entwicklung einer standardisierten Dokumentation gehört auch eine Definition von interoperablen Schnittstellen zu anderen Versorgern.

**Nr. 34a:** Es sollte das ärztliche oder nicht-ärztliche Personal im Rahmen der Einsatzdokumentation als Pflichtangabe festhalten, ob nach standardisierten Kriterien ein Notfall vorliegt.

**Nr. 33b: Diese Schnittstellen sollten... (n=392)**

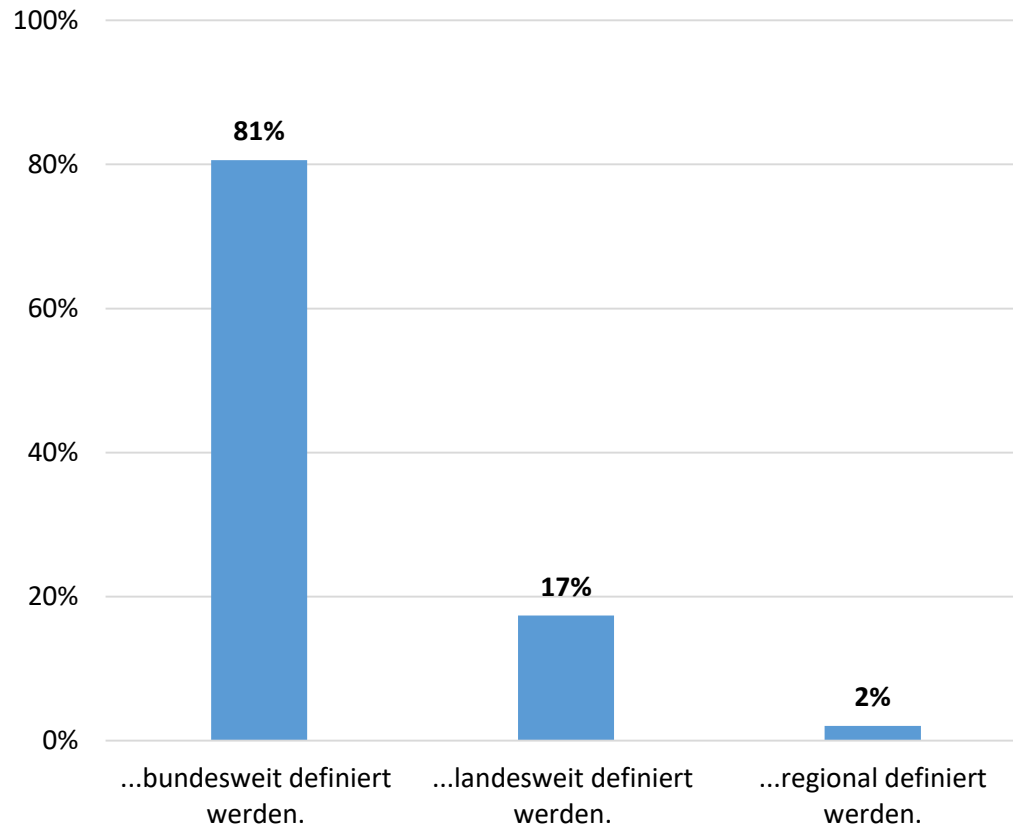

**Nr. 34b: Diese standardisierten Kriterien sollten..... (n=382)**

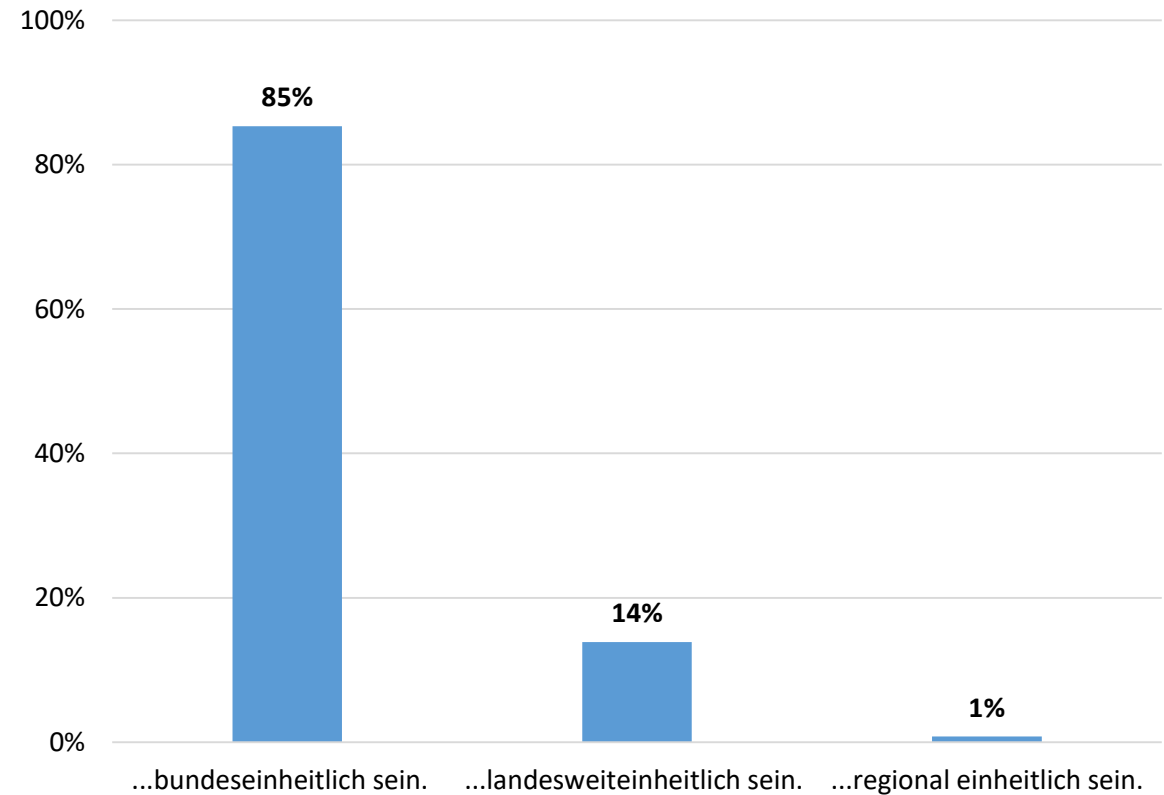

Supplement: MOESM3 [file 20208908]
